# Supplementary material
Source: PubMed Central journal article supplement (PMC6264887)

## Supplemental Materials

**Distribution of propensity scores across matched and unmatched groups in the analyses.**

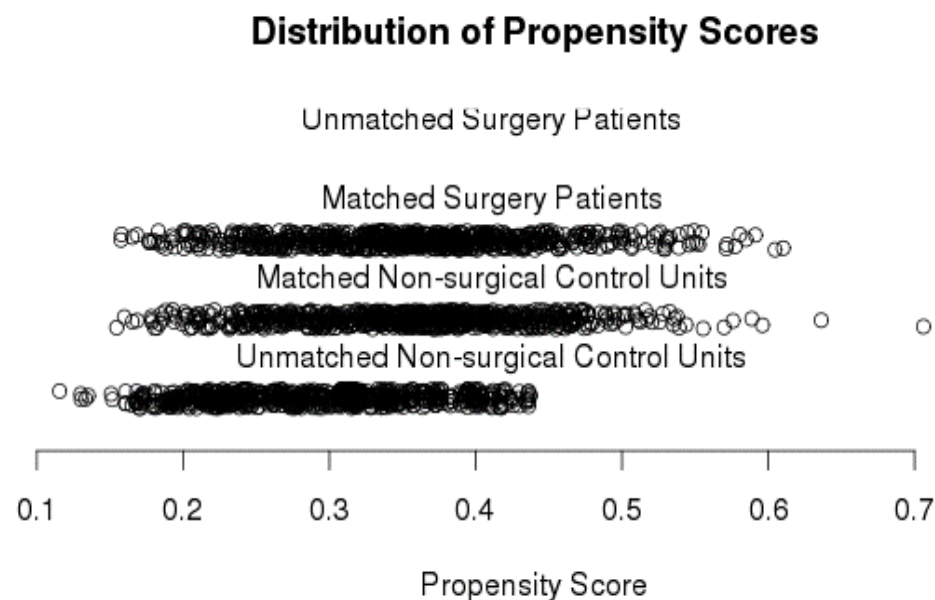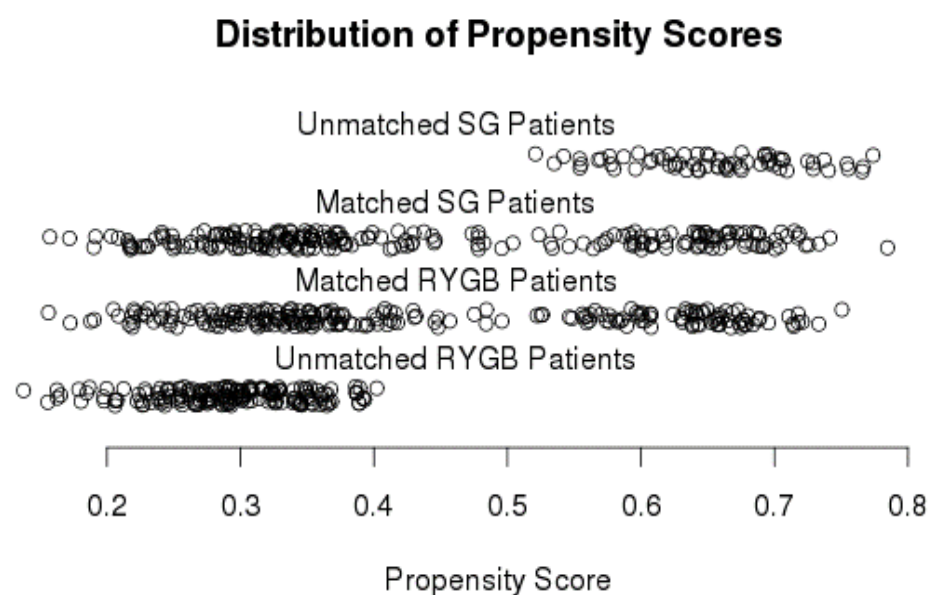

Supplement: NIHMS993612-supplement-Figure_S1.pdf [file NIHMS993612-supplement-Figure_S1.pdf]
